# Supplementary material for: Secretory pathway retention of mutant prion protein induces p38-MAPK activation and lethal disease in mice
Source: PubMed Central journal article supplement (PMC4847012; doi:10.1038/srep24970), 2016-04-27
Supplement: srep24970-s1.pdf [file srep24970-s1.pdf]

**Supplementary information for “Secretory pathway retention of mutant prion protein induces p38-MAPK activation and lethal disease in mice”**

*Berta Puig, Hermann C. Altmeyen, Sarah Ulbrich, Luise Linsenmeier, Susanne Krasemann, Karima Chakroun, Claudia Y. Acevedo-Morantes, Holger Wille, Jörg Tatzelt, and Markus Glatzel*

**Supplementary Fig. 1. PrP $\Delta$ 214-229 is Endo H sensitive and GPI-anchored in SHSY5Y cells.** (a) Lysates of SHSY5Y cells transiently transfected with WTPrP<sup>C</sup> or PrP $\Delta$ 214-229 were treated with EndoH. PrP $\Delta$ 214-229 is EndoH sensitive, thus confirming the results obtained with the N2a cells. (b) After treating SHSY5Y cells transiently transfected with WTPrP<sup>C</sup> and PrP $\Delta$ 214-229 with Triton X-100, PrP $\Delta$ 214-229 is localized at the pellet fraction, indicative of misfolding, as obtained with N2a cells (Fig. 1). (c) Confocal images of SHSY5Y cells transiently transfected with WTPrP<sup>C</sup> or PrP $\Delta$ 214-229 and labeled for PrP (green) show intracellular retention of PrP $\Delta$ 214-229, presumably in the ER, under permeabilized conditions. Under non-permeabilizing conditions there is decreased presence of PrP $\Delta$ 214-229 at the plasma membrane as observed for stably transfected N2a cells. Scale bar is 10  $\mu$ m.

**Supplementary Fig. 2. Characterization of a low expressing PrP $\Delta$ 214-229 line of transgenic mice.** The transgenic mouse line Tg((PrP $\Delta$ 214-229)<sup>L52</sup>) shows approximately 12 % of WTPrP<sup>C</sup> expression that is set to 100%.

**Supplementary Fig. 3. Tg(PrP $\Delta$ 214-229) mice lose weight around week 30 and brains present with little vacuolation in the white matter of the cerebellum, PK resistant PrP and no signs of gliosis.** (a) Animals were weighted once a week. Starting at week 30, Tg(PrP $\Delta$ 214-229) mice gradually lose weight. (b) Hematoxylin-eosin staining shows slight vacuolation in the white matter of the cerebellum (arrows). Magnification shows also vacuoles in the white matter. Cortex and hippocampus are the areas where PK resistant PrP is found as revealed with the SAF84 antibody after PK digestion (arrow point to intracellular aggregates). No signs of gliosis are seen in any of the observed areas as revealed with GFAP staining (astrocytes) and with Iba1 staining (microglia). Scale bar is 100  $\mu$ m.

**Supplementary Fig. 4. No canonical ER stress is observed in Tg(PrP $\Delta$ 214-229) mouse brains.** Representative Western blots of brain homogenates from clinical Tg(PrP $\Delta$ 214-229) mice compared to age-matched WTP $\text{PrP}^{\text{C}}$  mice or from pre-clinical Tg(PrP $\Delta$ 214-229) mice (17 weeks old) developed with antibodies against typical ER stress markers Grp78 (Bip) (a), eIF2 $\alpha$  and activated eIF2 $\alpha$  (b), ATF-6 and CHOP (c). There are no significant differences either at pre-clinical or clinical time points.

**Supplementary Fig. 5. Fyn, ERK 1/2 and SAPK/JNK are not activate in Tg(PrP $\Delta$ 214-229) mouse brains.** Representative Western blots of brain homogenates from clinical Tg(PrP $\Delta$ 214-229) (n=5) compared to age-matched WTP $\text{PrP}^{\text{C}}$  mice (n=4) of: (a) Src kinase (when it is not phosphorylated at position Y416 (Src nonY416) or when it is active and phosphorylated at position Y416 (SrcY416). (b) Fyn kinase when it is phosphorylated at position Y528 (FynY528). Blots were first related to actin and then to total Fyn. No differences were seen between WTP $\text{PrP}^{\text{C}}$  and PrP $\Delta$ 214-229. Also, no differences were observed for phosphorylated ERK 1/2 (c) and for phosphorylated SAPK/JNK (d). Tubulin blots for total Fyn and total ERK1/2 are the same because the blot was re-used without stripping due to different sizes of the proteins of interest.

**Supplementary Fig. 6. Other signaling proteins described as being activated through PrP are not activated in Tg(PrP $\Delta$ 214-229) mice.** Western blots of (a) STEP, (b) cPLA2 and (c) calpain showed no differences between WTP $\text{PrP}^{\text{C}}$  and Tg(PrP $\Delta$ 214-229) brain homogenates.

## Supplementary Fig. 1

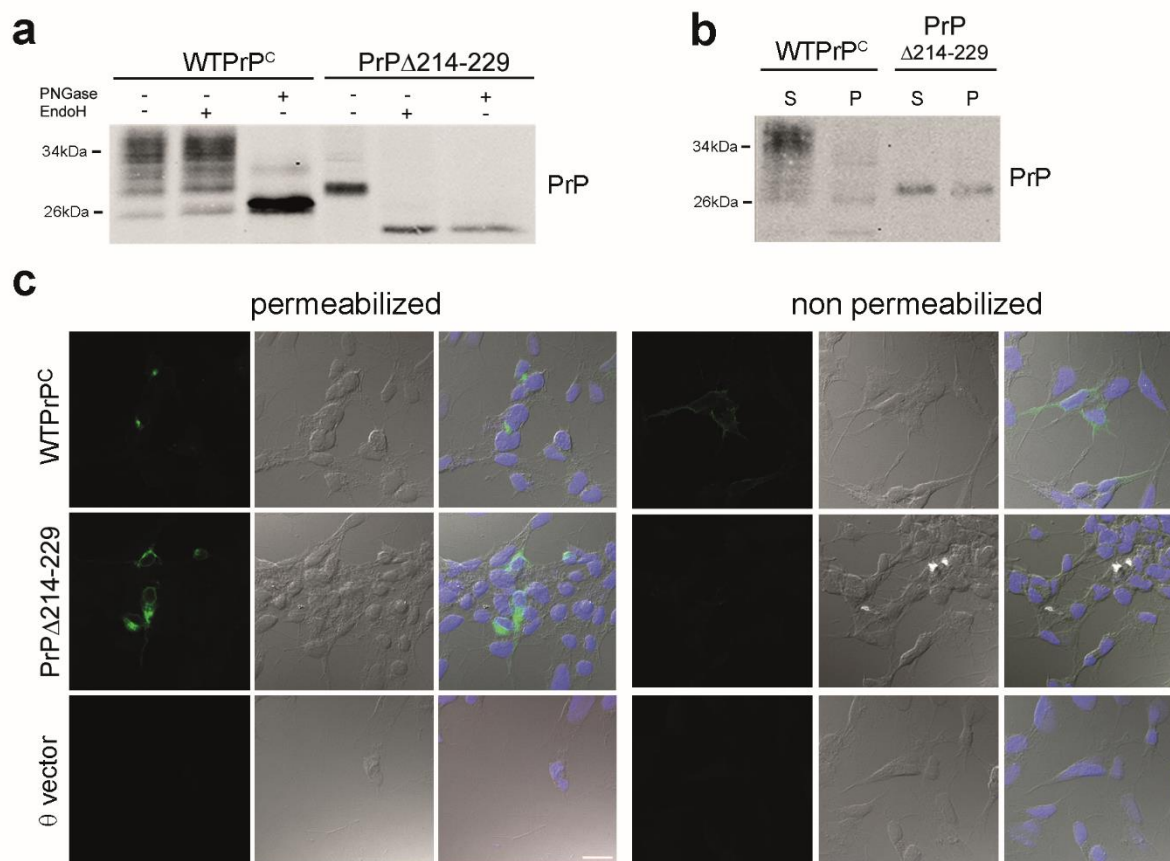

## Supplementary Fig. 2

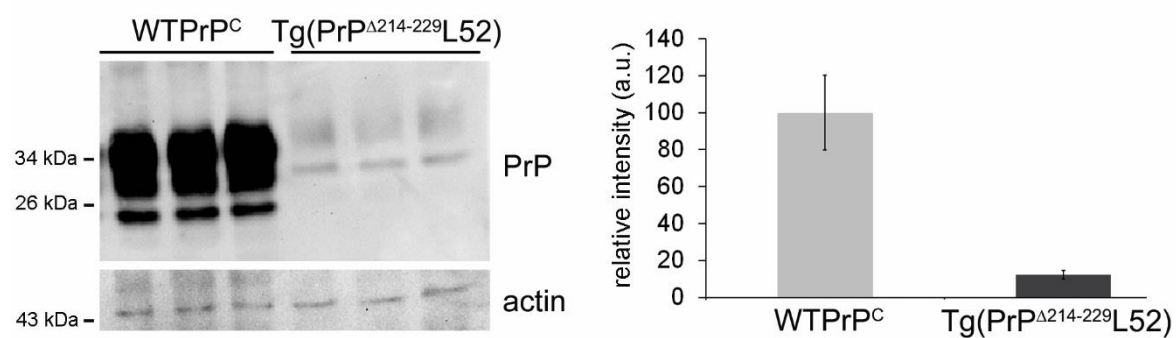

Supplementary Fig. 3

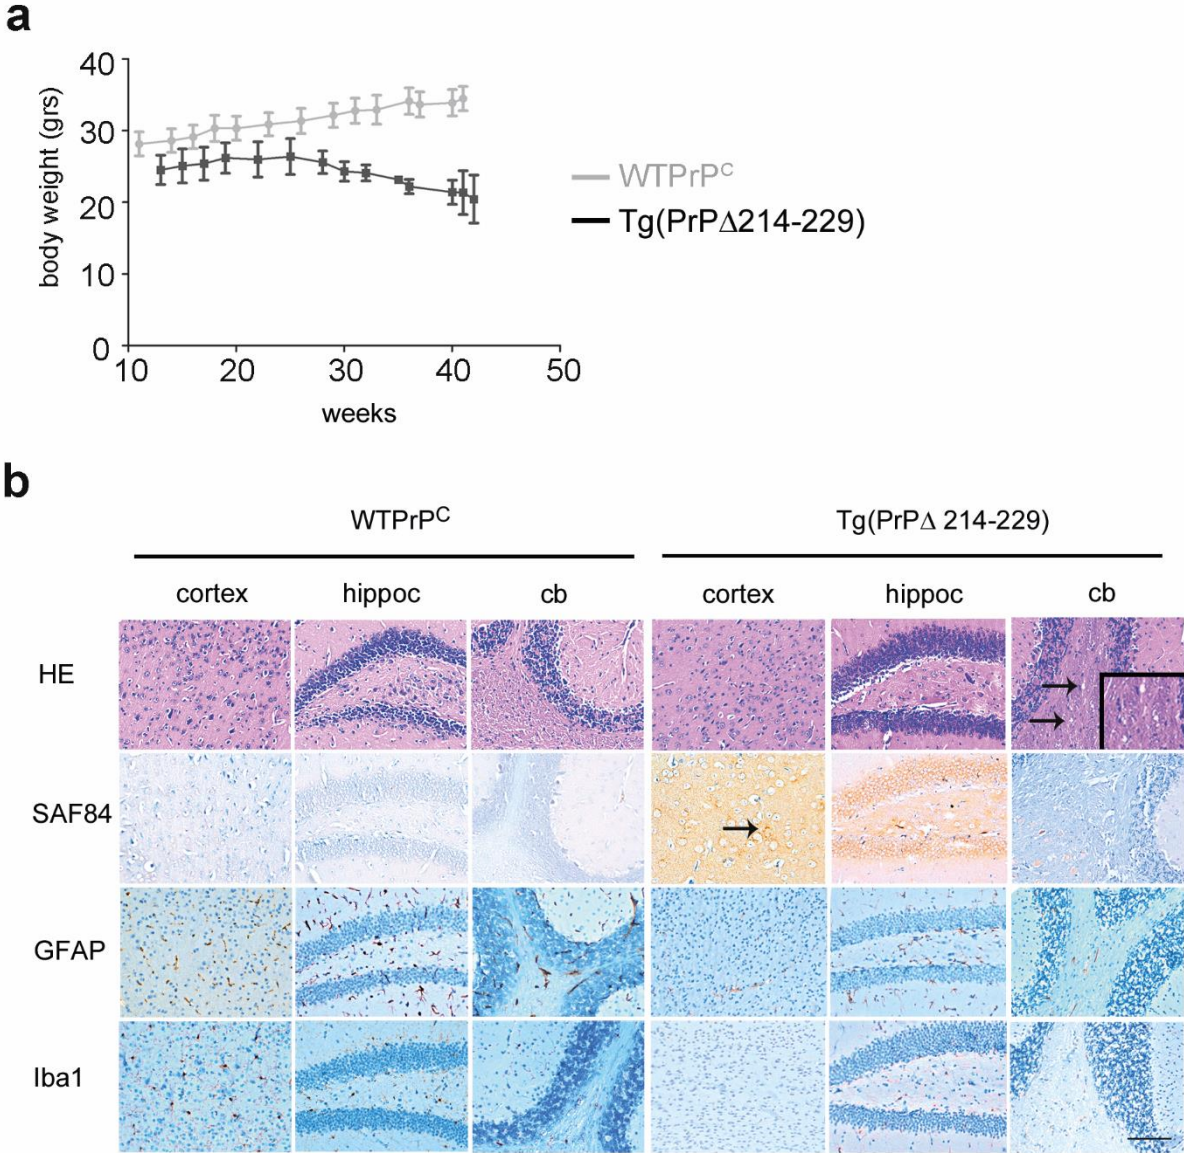

**Supplementary Fig. 4**

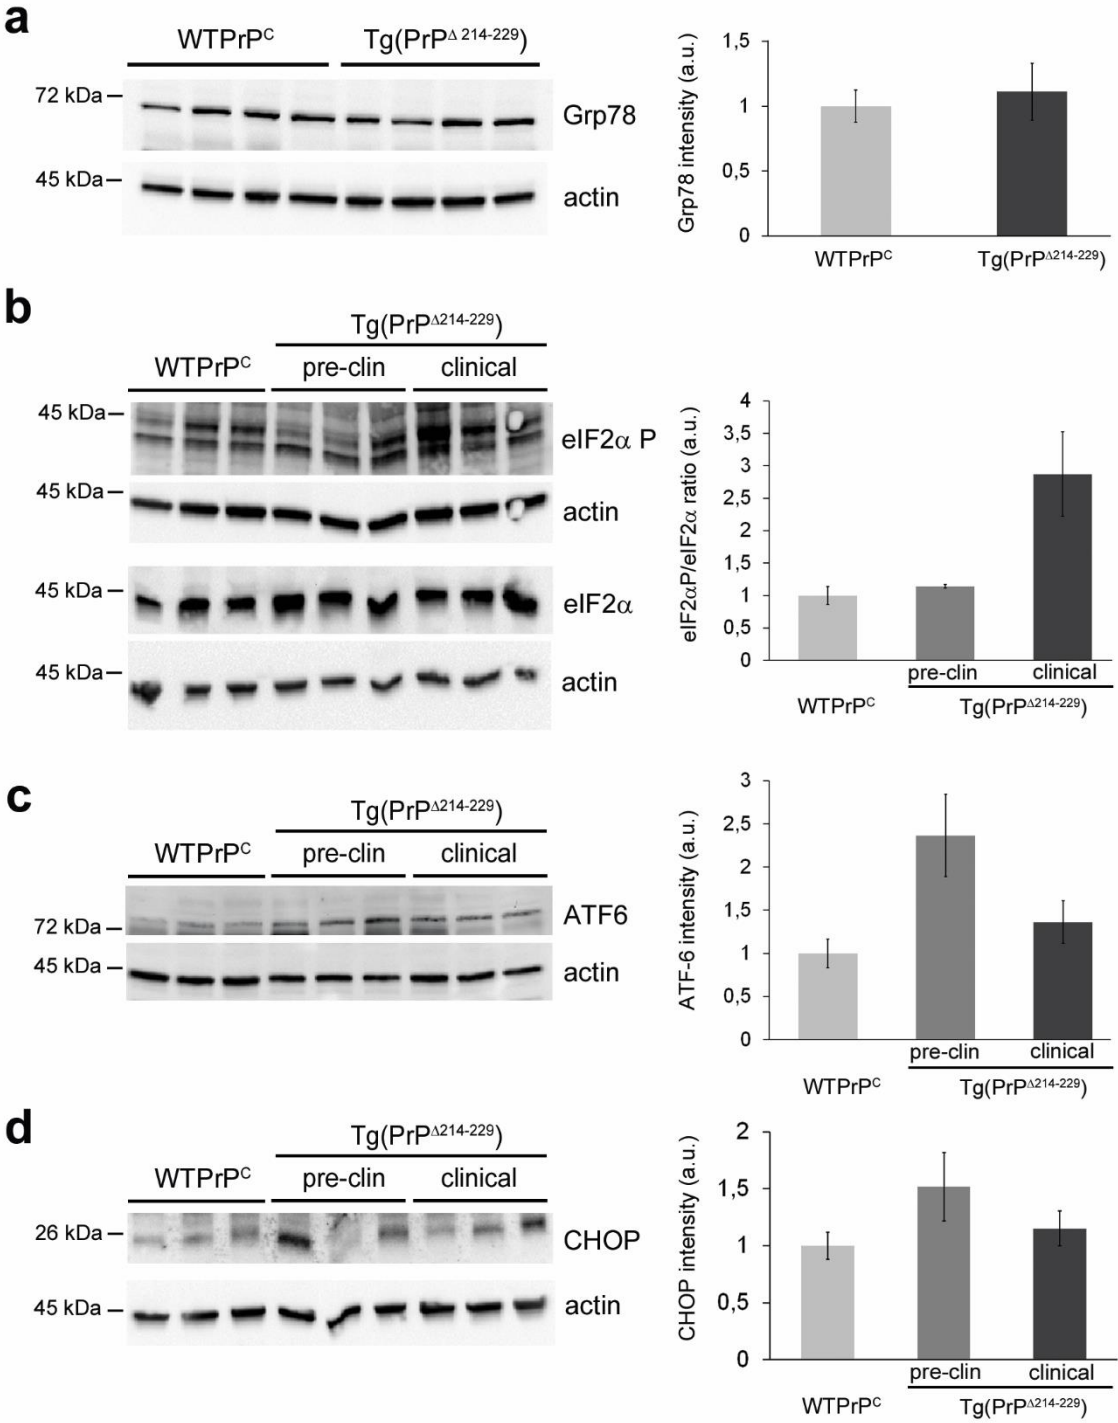

## Supplementary Fig. 5

**a**

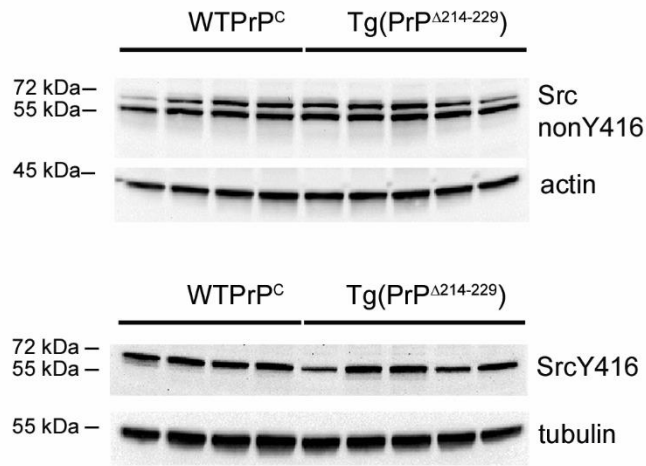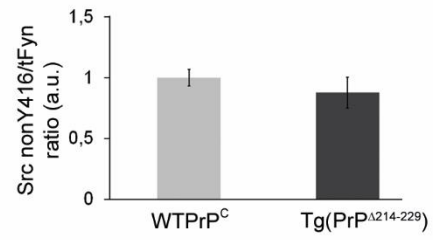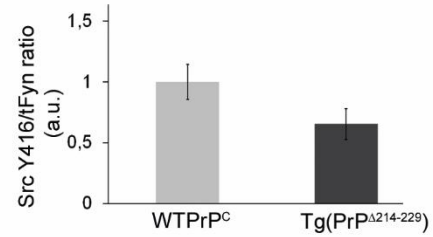

**b**

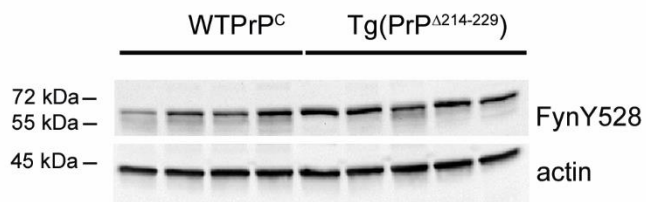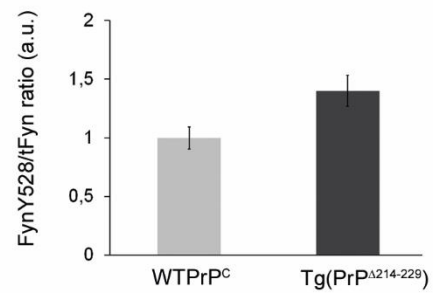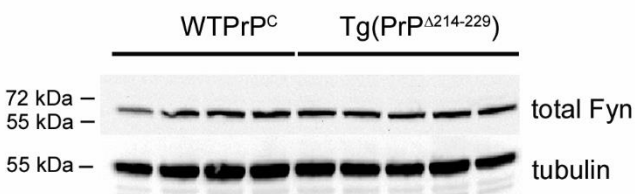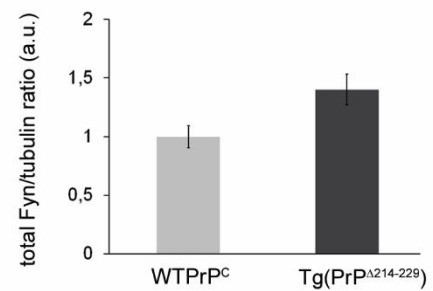

**c**

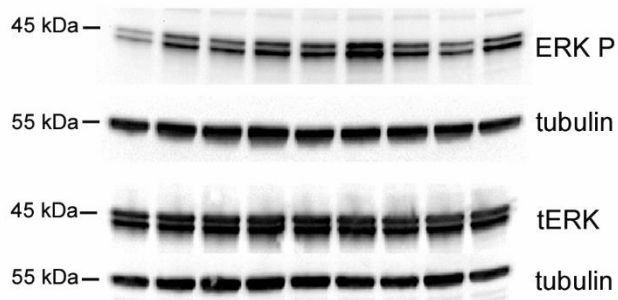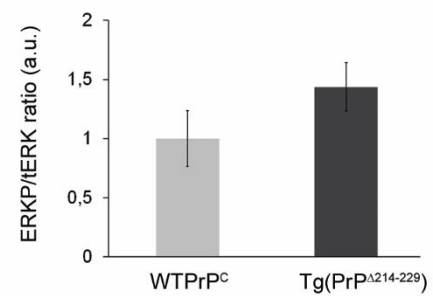

**d**

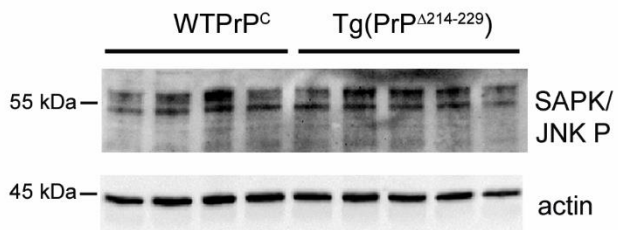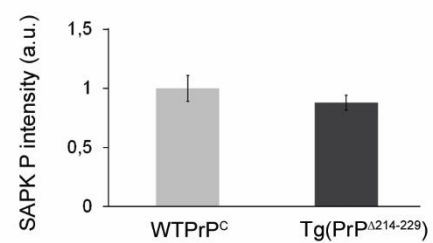



**Supplementary Fig. 6**

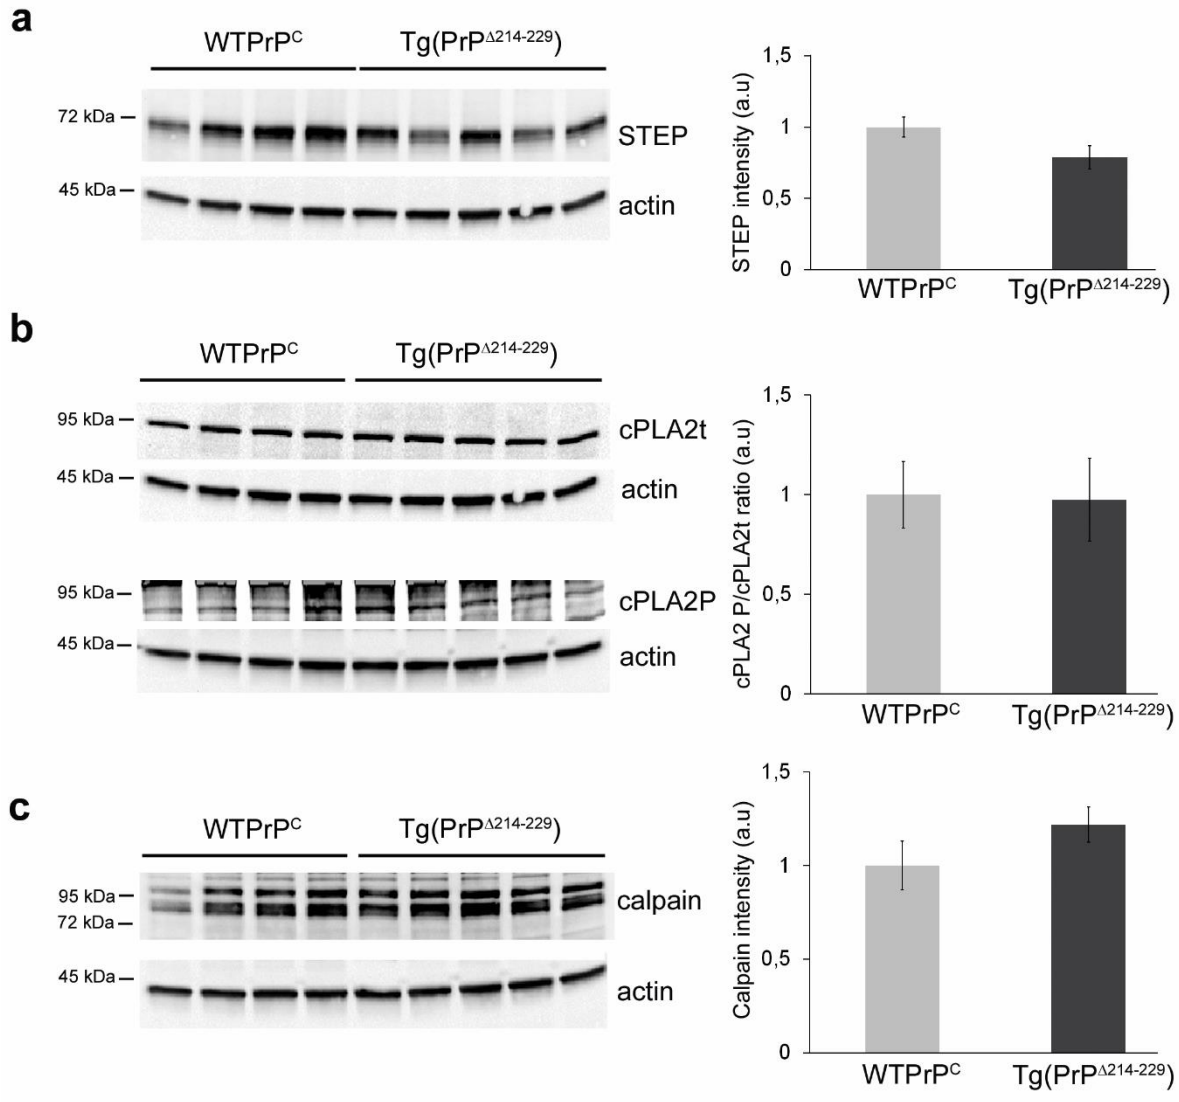

## Supplementary Methods

### Generation of PrP $\Delta$ 214-229

Primers used for deletion from amino acid 214-229: F:

GGTGGAGCAGATGATGTGCTCCAGCAGCACC

GTGC and R: GCACGGTGCTGCTGGAGCACATCTGCTCCACC.

### Generation of Tg(PrP $\Delta$ 214-229) mice

To insert the PmlI restriction site after the stop codon of PrP $\Delta$ 214-229 DNA the following primers were used: F: CCCAAGGAGAAAC**CACGTGCCCTCGAGGTCCTTC**; R: GAAGGACCTCGAGGG**CACGTG**TTTCTCCTTGGG (PmlI restriction site is in bold). Positive animals for the transgene were selected by PCR using the following primers: F: ATGGCGAACCTTGGCTACTG; R: GCTGCTGGAGCACATCTGCT.

### Table 1- List of antibodies and dilutions used in this study



| <b>Antibody</b>              | <b>Use</b> | <b>Dilution</b> | <b>Source</b>                                       |
|------------------------------|------------|-----------------|-----------------------------------------------------|
| <b>3F4 (PrP)</b>             | WB<br>ICC  | 1:1000<br>1:200 | Covance                                             |
| <b>POM 1 (PrP)</b>           | WB<br>IHC  | 1:2000<br>1:250 | Prof.A. Aguzzi (Zurich)                             |
| <b>POM 2 (PrP)</b>           | WB         | 1:2000          | Prof.A. Aguzzi (Zurich)                             |
| <b>Calnexin</b>              | ICC        | 1:300           | Stressgene                                          |
| <b>Actin</b>                 | WB         | 1:2000          | Millipore                                           |
| <b>Tubulin</b>               | WB         | 1:5000          | Dev. Stud. Hybridoma Bank, Univ. of Iowa            |
| <b>Src Family (Y416)</b>     | WB         | 1:1000          | Cell Signaling                                      |
| <b>Src Family (non Y416)</b> | WB         | 1:1000          | Cell Signaling                                      |
| <b>Total Src Family</b>      | WB         | 1:1000          | Cell Signaling                                      |
| <b>Fyn Y518</b>              | WB         | 1:1000          | BD Transduction Laboratories                        |
| <b>Fyn</b>                   | WB         | 1:1000          | Cell Signaling                                      |
| <b>p38 MAPK</b>              | WB         | 1:1000          | Cell Signaling                                      |
| <b>P-p38-MAPK T180/Y182</b>  | WB         | 1:500           | Cell Signaling                                      |
| <b>p44/42 MAPK(ERK1/2)</b>   | WB         | 1:1000          | Cell Signaling                                      |
| <b>P-p44/42(T202/Y204)</b>   | WB         | 1:1000          | Cell Signaling                                      |
| <b>P-MSK1 (T71)</b>          | WB         | 1:000           | Cell Signaling                                      |
| <b>P-HSP27 (S82)</b>         | WB         | 1:1000          | Cell Signaling                                      |
| <b>p-ATF-2( T71)</b>         | WB         | 1:1000          | Cell Signaling                                      |
| <b>Calpain</b>               | WB         | 1:1000          | Cell Signaling                                      |
| <b>eIF2alpha</b>             | WB         | 1:1000          | Cell Signaling                                      |
| <b>P-eIF2alpha (S51)</b>     | WB         | 1:1000          | Cell Signaling                                      |
| <b>ATF-6</b>                 | WB         | 1:1000          | Novus Biologicals                                   |
| <b>GrP78</b>                 | WB         | 1:1000          | BD Transduction Laboratories                        |
| <b>CHOP</b>                  | WB         | 1:500           | Cell Signaling                                      |
| <b>cPLA2</b>                 | WB         | 1:1000          | Cell Signaling                                      |
| <b>P-cPLA2 (S505)</b>        | WB         | 1:1000          | Cell Signaling                                      |
| <b>Beta III tubulin</b>      | ICC        | 1:500           | Sigma Aldrich                                       |
| <b>PDI</b>                   | ICC        | 1:400           | StressMarq Biosciences Inc.                         |
| <b>GM130</b>                 | ICC        | 1:300           | Abcam                                               |
| <b>LAMP-1</b>                | ICC        | 1:250           | Clone 1D4B Dev. Stud. Hybridoma Bank, Univ. of Iowa |
| <b>TGN46</b>                 | ICC        | 1:500           | Abcam                                               |
| <b>KDEL</b>                  | ICC        | 1:400           | Pierce (Thermo Scientific)                          |
| <b>KDEL Receptor</b>         | ICC        | 1:400           | Abcam                                               |
| <b>Iba-1</b>                 | IHC        | 1:500           | Wako Chemicals                                      |
| <b>GFAP</b>                  | IHC        | 1:200           | DAKO                                                |
| <b>SAF 84</b>                | IHC        | 1:100           | Cayman Chemicals                                    |
